# Supplementary material
Source: Research Square preprint supplement (doi:10.21203/rs.3.rs-9587527/v1)
Supplement: Supplementary file 1 [file 3e5c9c032615b35337960a41.docx]

**Beyond Bubble Resolution: Neurological Recovery After Iatrogenic Gas Embolism–Induced Cardiac Arrest Treated with Hyperbaric Oxygen — A Case Report**

*Short title: Gas Embolism, Cardiac Arrest and HBOT*

# Authors

**Saïd KORTLI, MD** (corresponding author)

Service de Médecine Intensive-Réanimation, Hôpital Louis Pasteur, Hôpitaux de Chartres, 4 rue Claude Bernard, 28000 Chartres, France.

Email: kortlisaid@outlook.com

**Anton SHAFRAN, MD**

Service de Médecine Intensive-Réanimation, Hôpital Louis Pasteur, Hôpitaux de Chartres, Chartres, France.

# Article type

Case report (International Journal of Emergency Medicine — case report criteria).

# Word count

Abstract: 298 words. Manuscript text (Background, Case presentation, Discussion): 1 466 words.

# Author contributions

S.K.: conceptualization, data curation, formal analysis, investigation, methodology, project administration, resources, visualization, writing — original draft, writing — review & editing. A.S.: writing — review & editing. All authors read and approved the final manuscript and agree to be accountable for all aspects of the work.

# Guarantor of the manuscript

S.K. takes responsibility for the integrity of the work as a whole, from inception to published article.

# Funding

None.

# Competing interests

The authors declare that they have no competing interests.

# Prior publication / presentation

The content of this case report has not been previously published or presented in any form.

# Patient consent

Written informed consent for publication of this case report and accompanying figures was obtained from the patient. Patient identifiers have been removed. The signed consent form is available from the corresponding author on request.

# Acknowledgements

We thank the hyperbaric medicine team at Hôpital Raymond Poincaré (Garches) for their rapid response and expert management, and the patient and her family for permission to publish this case report.
